# Supplementary material
Source: publisher site journal article supplement (https://zookeys.pensoft.net/article/87635/download/suppl/35/)
Supplement: Supplementary file

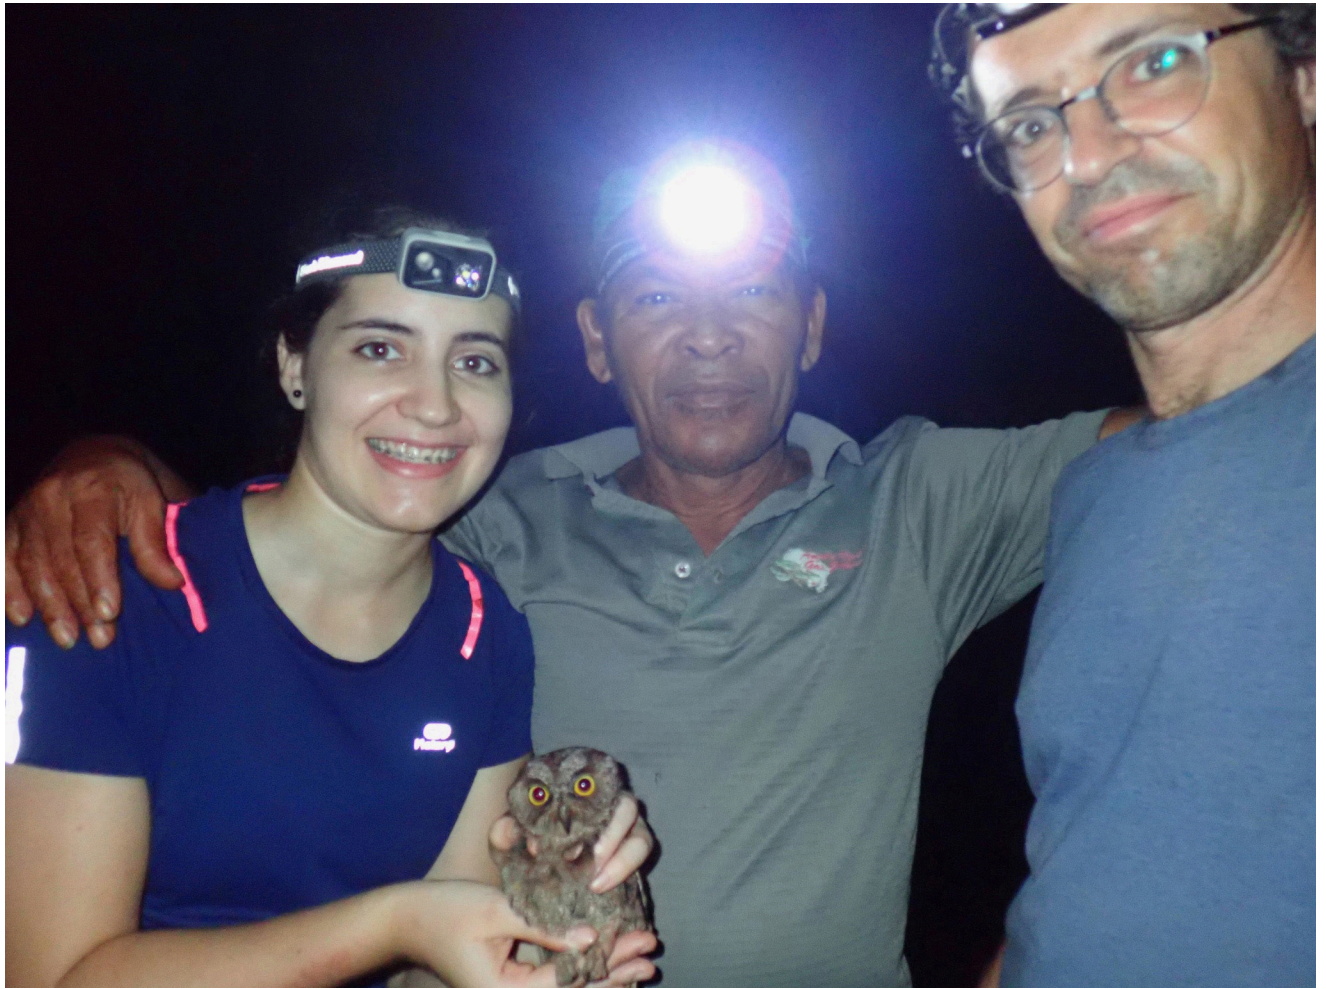

**Figure S3.** Photograph taken at Boca do Inferno, Príncipe Island, January 27, 2019, showing the Príncipe Scops-Owl *Otus bikegila* sp. nov., the two first authors of the paper (BF on the left and MM on the right), and Ceciliano do Bom Jesus, known as ‘Bikegila’ (centre), who started the 20-year saga that led to this discovery, and in honour of whom the new species was named (see ‘Etymology’).
